# Supplementary material
Source: publisher site journal article supplement (https://www.dovepress.com/article/271689)
Supplement: Supplementary file 1 [file get_supplementary_file.php]

**Supplementary Table 1 The clinical information of individuals in QRT-PCR**

| **Group** | **Number** | **Age** | **BMD-T value of femoral neck** | **BMD-T value of total lumbar vertebrae (L1-4)** | **BMD-T value**  **of total**  **hip** | **Maternal family history** | **BMI** **index** | **Smoking history** | **Drinking history** | **Coffee or soda history** | **Physical inactivity** | **Disease or drug that affects bone metabolism** |
| --- | --- | --- | --- | --- | --- | --- | --- | --- | --- | --- | --- | --- |
| **Male osteoporosis** | 1 | 82 | -3.7 | -4.2 | -4.0 | No | 21.6 | No | No | No | No | No |
| 2 | 70 | -0.9 | -2.5 | -1.2 | No | 29.4 | Yes | Yes | No | No | No |
| 3 | 61 | -1.4 | -2.4 | -2.5 | No | 21.5 | Yes | No | No | No | No |
| 4 | 57 | -1.9 | -2.5 | -1.3 | No | 24 | Yes | Yes | No | No | No |
| 5 | 52 | -2.4 | -2.5 | -1.6 | No | 22 | Yes | No | Yes | No | No |
| 6 | 82 | -2.1 | -2.8 | -2.3 | No | 18.5 | No | No | No | No | No |
| 7 | 75 | -1.8 | -2.5 | -1.6 | No | 28.1 | No | No | Yes | Yes | No |
| 8 | 78 | -2.3 | -2.5 | -2.1 | No | 24.8 | No | Yes | No | No | No |
| 9 | 84 | -0.8 | -2.5 | -0.6 | No | 25 | Yes | Yes | No | No | No |
| 10 | 76 | -1.2 | -2.5 | -1.9 | No | 31.1 | Yes | Yes | No | Yes | No |
| 11 | 66 | -1.9 | -2.6 | -0.9 | No | 23.0 | No | No | No | No | No |
| 12 | 83 | -1.8 | -2.5 | -1.1 | No | 21.1 | No | No | No | No | No |
| 13 | 65 | -1.3 | -2.5 | -0.3 | No | 22.5 | No | No | No | No | No |
| 14 | 63 | -2.7 | -3.0 | -1.8 | No | 24.2 | Yes | No | No | No | No |
| 15 | 72 | -1.6 | -3.0 | -0.3 | No | 23.9 | Yes | No | No | No | No |
| 16 | 65 | -0.5 | -2.5 | -1.1 | No | 21.9 | No | No | No | No | No |
| **Normal controls** | 1 | 59 | -0.7 | -0.8 | -0.7 | No | 26.4 | No | No | No | Yes | No |
| 2 | 63 | -0.5 | 2.6 | 2.7 | No | 21 | No | No | No | Yes | No |
| 3 | 66 | -0.4 | -0.5 | 0.5 | No | 24.4 | Yes | Yes | No | No | No |
|  | 4 | 57 | -0.9 | -1.0 | -1.0 | No | 28.1 | Yes | Yes | No | Yes | No |
|  | 5 | 62 | -0.5 | -1.0 | -0.6 | No | 21 | Yes | No | No | No | No |
|  | 6 | 52 | 0.3 | -0.4 | 1.1 | No | 27.5 | No | Yes | No | No | No |
|  | 7 | 78 | -1.0 | -0.3 | -0.5 | No | 23.4 | No | No | Yes | No | No |
|  | 8 | 80 | -1.0 | 1.8 | -0.8 | No | 24.2 | No | No | No | No | No |
|  | 9 | 67 | 0.2 | 0.8 | -0.6 | No | 28.4 | Yes | No | No | Yes | No |
|  | 10 | 57 | 0.2 | 1.2 | -0.6 | No | 26.3 | Yes | Yes | No | No | No |
|  | 11 | 71 | 1.6 | 2.7 | 1.2 | No | 27.0 | No | No | No | No | No |
|  | 12 | 69 | 0.7 | -1.0 | 0.8 | No | 27.7 | No | No | No | No | No |
|  | 13 | 61 | -0.3 | -0.6 | -0.6 | No | 29.7 | No | No | No | No | No |
|  | 14 | 50 | 0.2 | 0.8 | -0.5 | No | 32.4 | No | No | No | No | No |
|  | 15 | 67 | -0.1 | -1.0 | -0.3 | No | 27.8 | Yes | No | No | No | No |
|  | 16 | 50 | -0.2 | -0.8 | -0.5 | No | 24.2 | No | Yes | No | No | No |
|  | 17 | 76 | 1.2 | 1.6 | 1.0 | No | 20.2 | No | No | No | No | No |
|  | 18 | 58 | 1.1 | -1.0 | 0.7 | No | 32.9 | No | Yes | No | No | No |
|  | 19 | 67 | -1.0 | -0.9 | -1.0 | No | 26.6 | Yes | Yes | No | No | No |
|  | 20 | 67 | -0.2 | -0.8 | 0.0 | No | 27.0 | No | No | No | No | No |

BMD: bone mineral density; BMI: body mass index.
